# Supplementary material
Source: Springer Nature journal article supplement (https://www.springermedizin.de/resource/supplementary/40001_2013_103_MOESM3_ESM.pdf/9685268)

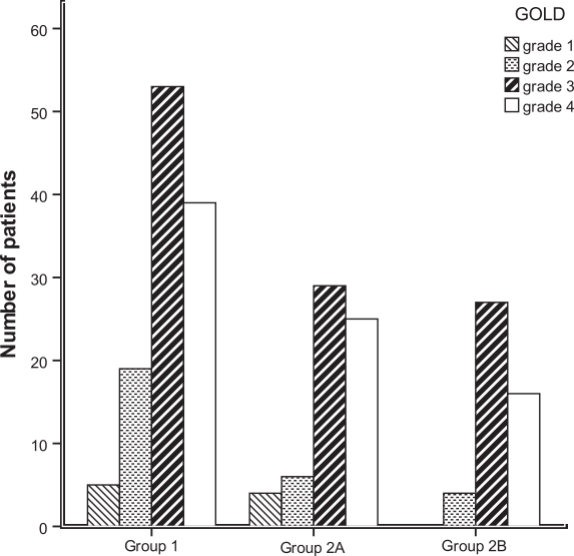

Supplement: MOESM3 [file 9685268]
